# Supplementary material
Source: publisher figshare collection journal article supplement (https://geolsoc.figshare.com/ndownloader/files/14138123)
Supplement: Supplementary file 1 [file 14138123]

**Table 1.** *Locality and sample information for modern Iceland CGC samples*

______________________________________________________________________________________________________________________________

**Figure no. Location Geomorphology Grain type Feature type Feature name Dominant CGC organism/s**

2A Krafla Fires Lava field Scoria 1 Rounded elongate track* Lichen (foliose)

2B Snæfellsjökull Alluvial Volcanic glass 1 Rounded elongate track* Moss

2C Sólheimajökull Moraine Scoria 2 Bowls Liverwort

2D Sólheimajökull Moraine Scoria 3 Borings* Liverwort

2E Central desert Desert Mix 4 Wedge elongate track* Lichen (various)

2F Sólheimajökull Moraine Volcanic glass 5 Pitting Liverwort

2G Snæfellsjökull Alluvial Volcanic glass 6 Asym. holes Moss

2H Snæfellsjökull Alluvial Volcanic glass 6 Asym. holes Moss

2I Geysir Geothermal Volcanic glass 7 Tunnels* Liverwort

2J Krafla Fires Lava field Volcanic glass 7 Tunnels Liverwort

2K Snæfellsjökull Alluvial Volcanic glass 8 Tramlines Liverwort

2L Snæfellsjökull Alluvial Volcanic glass 9 Cuts* Moss

2M Snæfellsjökull Alluvial Volcanic glass 9 Cuts* Moss

*Denotes feature is infilled with residue
